# Supplementary material
Source: PubMed Central journal article supplement (PMC5742051)
Supplement: NIHMS915929-supplement-3.pdf [file NIHMS915929-supplement-3.pdf]

## Supplementary Notes

### Additional methods

#### hESC Spontaneous Differentiation

**Teratoma.** Confluent hESCs grown on a MEF feeder layer were removed using a cell-scraper and 1 mg/mL Collagenase type IV (Life Technologies, 17104-019) treatment, and resuspended in PBS. One quarter of the cells from a confluent 100 mm dish was injected subcutaneously to the dorsal flank of a SCID mouse (NOD.Cg-Prkdc<sup>scid</sup> Il2rg<sup>tm1Wjl</sup>/SzJ (Stock #: 005557), Jackson Laboratory). Palpable tumors were typically observed 1-2 months after injection. Tumor samples were usually collected in 2-3 months, fixed in 4% paraformaldehyde and processed for paraffin embedding and hematoxylin and eosin staining following standard procedures. Mice injected with TKO hESCs were sacrificed 6 months after injection and dissected to confirm that teratomas had not formed. All mouse procedures were performed following NIH guidelines, and were approved by the local Institutional Animal Care and Use Committee (IACUC), the Institutional Biosafety Committee (IBC) as well as the Embryonic Stem Cell Research Committee (ESCRO).

**Embryoid Body Formation and Spontaneous Differentiation.** hESCs were expanded onto a 10 cm<sup>2</sup> dish on an iMEF feeder layer. Once the cells were confluent they were dissociated using 1 mg/mL Collagenase type IV (Life Technologies, 17104-019) and removed using a cell scraper. Cells were spun down at 200 g for 5 minutes and washed with phosphate buffered saline solution (PBS). This was repeated 2 times for a total of 3 washes. The cell clumps were then plated into 6-well low attachment plate in hESC media that lacks bFGF. One 10 cm dish gave enough cells for one 6 well plate. The cells were kept in the 6 well low attachment plate for a total of 5 days after which time they formed embryoid bodies. After 5 days the EBs were transferred to a 24 well

dish that has been coated with Geltrex (Life Technologies, A15696) for attachment and differentiation. The cells were kept in the 24 well dish for 7 days total with media change every 2 days. The media remained hESC media without bFGF.

### **Dot Blot**

Genomic DNA was extracted using the DNeasy Blood & Tissue Kit (Qiagen, 69504) following manufacturer's guidelines and diluted to 200 ng/ $\mu$ l and 100 ng/ $\mu$ l in 20  $\mu$ l total volume. 5  $\mu$ l of 0.5 M NaOH was added to each sample and the samples were incubated at 99°C for 5 minutes. Samples were cooled on ice, spun down and neutralized with 2.5  $\mu$ l of 6.6 M Ammonium Acetate. 2.75  $\mu$ l of each mixture was spotted on a nitrocellulose membrane and allowed to air dry. The membrane was baked for 2 hrs at 80°C and then incubated in blocking buffer for 2 hrs at RT. 5hmC antibody (Active Motif, 39769) at a 1:10,000 dilution in blocking buffer was added to the membrane and incubated overnight at 4C. The membrane was washed in phosphate buffered saline (PBS) with 0.1% Tween 20 (PBSTw), 3 times for 15 minutes each and then incubated with HRP Goat anti-Rabbit IgG (Active Motif, 15015) in blocking buffer for 2 hrs at RT. The membrane was washed again 3 times in PBSTw, and then once in ddH<sub>2</sub>O for 5 minutes. Luminata Crescendo Western HRP Substrate (Millipore, WBLUR0100) was used for detection.

### **Mass Spectrometry Quantification of mC and 5hmC**

4  $\mu$ g of genomic DNA was denatured for 5 minutes at 95°C, then sequentially digested with nuclease P1 (Wako Chemicals, 0218055501), *Crotalus adamanteus* venom phosphodiesterase (Sigma, P3243), and *Escherichia coli* alkaline phosphatase (P5931, Sigma). Digested nucleosides were desalted, filtered and analyzed by UHPLC/MS/MS on an Agilent 1290 with UHPLC coupled to a 6460 Triple Quadrupole

LC/MS system using multiple reaction monitoring and the following ion transitions: dC, 228.1→112.1; mdC, 242.1→126.1; hmdC, 248.1→142.1. Molar quantities of dC, mdC, and hmdC were determined by fitting signal intensities to a standard curve of known concentrations. mdC and hmdC quantities were expressed as a molar ratio compared to total dC, mdC, and hmdC present in each sample.

### **Pluripotency and Lineage Marker Staining**

**Alkaline Phosphatase Staining.** The VECTOR Red Alkaline Phosphatase (AP) Substrate Kit (Vector Labs, SK-5100) was used. Cultured hESCs were washed once with PBS and then incubated with substrate working solution for 30 minutes. Cells were washed 3 times with PBS and images were taken.

**Immunofluorescence staining.** Cells were fixed with 4% paraformaldehyde for 10 minutes, washed once with PBS and permeabilized in PBST (PBS + 0.15% Triton-X) for 15 minutes. Blocking was done for 5 minutes at RT with blocking solution (5% donkey serum in PBST). Primary and secondary antibodies were diluted in blocking solution. Primary antibodies were incubated at RT for 1 hr. The following primary antibodies were used at a 1:100 dilution: OCT4 (Santa Cruz, sc-5279), NANOG (CosmobioJapan, RCAB0004P-F), and SOX2 (Santa Cruz, sc-17320). The following antibodies were used at a 1:500 dilution: PAX6 (Covance, PRB-278P) and SOX1 (R&D Systems, AF3369). After primary antibody staining the cells were washed three times with PBST and then incubated with the appropriate Molecular Probes Alexa Fluor dye conjugated secondary antibodies (Life Technologies, AF3369) and DAPI for 1 hr at RT. After secondary antibody staining cells were washed 3 times with PBS and images were taken.

## **FACS (Fluorescence Activated Cell Sorting) Analysis**

**Intracellular marker.** NE differentiated cells at the desired time point were disaggregated with TrypLE for 5 minutes and washed with cold FACS buffer (5% Fetal Bovine Serum, Life Technologies, 261400799, in PBS). Cells were pelleted by centrifugation and washed again with FACS buffer. Each sample was resuspended in FACS buffer and incubated with a Live/Dead Fixable stain (Life Technologies L34964, 1:1,000) for 30 minutes at RT. Afterwards cells were washed with FACS buffer and resuspended in fixation solution (eBioscience, 00-5523-00) for 1 hr at RT. Cells were washed with permeabilization buffer (eBioscience, 00-5523-00) and then resuspended in permeabilization buffer and the appropriate antibody: OCT4-APC (eBioscience 50-5841-82, 1:25) or PAX6 (Covance PRB-278P, 1:400) for 1 hr at RT. For OCT4 flow analysis the cells were washed with FACS buffer and analyzed by FACS. For PAX6 flow analysis, cells were washed with FACS buffer and then incubated with the appropriate Molecular Probes Alexa Fluor dye conjugated secondary antibody (Life Technologies A21206, 1:500) for 1 hr at RT. Cells were then washed with FACS buffer and analyzed by FACS.

**Surface marker.** Confluent hESCs were disaggregated with TrypLE for 5 minutes and washed with cold FACS buffer. Cells were pelleted by centrifugation and washed again with FACS buffer. Each sample was resuspended in FACS buffer with the appropriate conjugated antibody: Tra1-60-FITC (BD Biosciences, 560380) or Tra1-81-FITC (BD Biosciences, 560194). Cells were incubated in FACS buffer with the antibody for 30 minutes on ice. After staining cells were washed two times with FACS buffer and resuspended in FACS buffer with DAPI and analyzed by FACS.

## **Quantitative qRT-PCR**

Total RNA was isolated with the RNeasy Mini Kit (Qiagen, 74136). DNA was removed from RNA samples using genomic DNA eliminator spin columns. cDNA was produced from RNA using SuperScript III Reverse Transcriptase kit (Life Technologies, 18080051) or High Capacity cDNA Reverse Transcriptase kit (Life Technologies, 4368813). Quantitative real-time PCR was performed in triplicate using Absolute QPCR SYBR Green Low ROX Mix (Thermo Scientific, AB4322B). Primers used for qRT-PCR are in Supplementary Table 11. Please note that the primer pair we used for *PAX6* binds to Exon 6, as a result it is downstream of the *PAX6* promoters (P0 and P1) and will not differentiate between P0 and P1 transcripts.

## **Epimark**

In addition to base level genome-wide 5hmC profiling, 5hmC at the *PAX6* P0 promoter was validated using the Epimark 5hmC and 5-mC Analysis kit (NEB, E3317S) according to the manufacturer's protocol. Briefly genomic DNA was extracted using the DNeasy Blood & Tissue Kit (Qiagen, 69504) following manufacturer's guidelines. 10 ug of DNA for each sample was divided into 6 tubes. The first 3 tubes were treated with beta-glucoosyltransferase (BGT) overnight. 2 of the 6 total tubes were digested with MspI (one tube had been treated with BGT whereas the other had not), 2 of the 6 tubes were digested with HpaI (one tube had been treated with BGT whereas the other had not) and 2 of the 6 original tubes were left undigested. After overnight digestion we performed qRT-PCR analysis. The primers used for analysis (Epimark: *PAX6* P0 promoter) are found in Supplementary Table 11.

## Supplementary Tables

**Supplementary Table 1. CRISPR gRNA sequences used for inactivation of *TET*, *DNMT3B* and *Cas9* genes, for HDR-mediated repair of *TET1* and for targeted demethylation of *PAX6* and *SOX10* promoters and *LEFTY2* enhancer.**

| Gene Targeted                 | Purpose                                             | CRISPR Target Sequence |
|-------------------------------|-----------------------------------------------------|------------------------|
| <i>TET1</i>                   | Gene knockout (CrT1A)                               | GCCCCAAGGTGTGTATAATA   |
|                               | Gene knockout (CrT1B)                               | GGCCCATATTATACACACCT   |
| <i>TET2</i>                   | Gene knockout (CrT2A)                               | CTTATGGTCAAATAACGACT   |
| <i>TET3</i>                   | Gene knockout (CrT3A)                               | GTCATCTACACGGGAAGGA    |
|                               | Gene knockout (CrT3B)                               | GATCGAGAAGGTCATCTACA   |
| <i>TET1</i> (mutated)         | HDR-mediated correction of the <i>TET1</i> mutation | CCCAAGGTGTGTATAAATAT   |
| <i>DNMT3B</i>                 | Gene knockout                                       | TCATTCTTTGATGCTATCAC   |
| <i>Cas9</i>                   | Gene knockout                                       | TTTCGCCGCTGTCGAACAGC   |
| <i>PAX6 P0</i> Promoter       | Targeted demethylation (Cr6)                        | CCTAGCTCCCCTCCAGGACC   |
|                               | Targeted demethylation (Cr7)                        | TTACCAAGAACTAGGTCAC    |
|                               | Targeted demethylation (Cr9)                        | CTAGCTGGCCAGTTTCTGTC   |
| <i>SOX10</i> Promoter         | Targeted demethylation                              | CACAGTAAGAGAGACTTCTC   |
| <i>LEFTY2</i> Distal Enhancer | Targeted demethylation                              | GAGAAGCAGAGCAGGAAGTC   |
| <i>HBB</i>                    | Targeted demethylation, non-targeting Control       | TTTGCATATTCTGGAGACGC   |

**Supplementary Table 2. Sequences at *TET1*, *TET2* and *TET3* for the *TET* knockout lines.**

| <b>hESC Line</b>               | <b><i>TET1</i> genotype</b> | <b><i>TET2</i> genotype</b> | <b><i>TET3</i> genotype</b> | <b>CRISPR gRNAs</b> |
|--------------------------------|-----------------------------|-----------------------------|-----------------------------|---------------------|
| <b>HUES8 WT</b>                | WT                          | WT                          | WT                          | CrT1B, CrT2A, CrT3B |
| <b>HUES8 <i>TET1</i> KO</b>    | -8bp/-8bp                   | WT                          | WT                          | CrT1B               |
| <b>HUES8 <i>TET2</i> KO</b>    | WT                          | -16bp/-16bp                 | WT                          | CrT2A               |
| <b>HUES8 <i>TET3</i> KO</b>    | WT                          | WT                          | -4bp/-4bp                   | CrT3B               |
| <b>HUES8 <i>TET1/2</i> DKO</b> | -13bp/-1bp                  | -4bp/-11bp                  | WT                          | CrT1B, CrT2A        |
| <b>HUES8 <i>TET1/3</i> DKO</b> | +1bp/+1bp                   | WT                          | -4bp/+1bp                   | CrT1B, CrT3B        |
| <b>HUES8 <i>TET2/3</i> DKO</b> | WT                          | -8bp/+1bp                   | -4bp/-4bp                   | CrT2A, Cr3B         |
| <b>HUES8 TKO</b>               | +1bp/+1bp                   | +1bp/+1bp                   | -4bp/+1bp                   | CrT1B, CrT2A, CrT3B |
| <b>MEL1 WT</b>                 | WT                          | WT                          | WT                          | CrT1A, CrT2A, CrT3A |
| <b>MEL1 TKO</b>                | +1bp/+1bp                   | -5bp/-1bp                   | -1bp/+1bp                   | CrT1A, CrT2A, CrT3A |

Supplementary Table 3. qPCR primers used for mRNA expression analysis, Epimark 5hmC analysis and ChIP-qPCR (for TET1, DNMT3B, H3K4me3 and H3K27me3).

| Genomic Region                       | Forward Primer            | Reverse Primer           |
|--------------------------------------|---------------------------|--------------------------|
| <i>T</i>                             | ACCCAGTTCATAGCGGTGAC      | CCATTGGGAGTACCCAGGTT     |
| <i>DNMT1</i>                         | AGGCGGCTCAAAGATTGGAA      | GCAGAAATTCGTGCAAGAGATTC  |
| <i>DNMT3A</i>                        | AGTACGACGACGACGGCTA       | CACACTCCACGCAAAGCAC      |
| <i>DNMT3B</i>                        | GACTGCTTGGAATACAATAGGA    | GCACCACAAAACATCTTCTTT    |
| <i>FOXA2</i>                         | GGGAGCGGTGAAGATGGA        | TCATGTTGCTCACGGAGGAGTA   |
| <i>FOXG1</i>                         | CCGCACCCGTCAATGACTT       | CCGTCGTAAAACCTGGCAAAG    |
| <i>GAPDH</i>                         | GGAGCCAAACGGGTATCATCTC    | GAGGGGCCATCCACAGTCTTCT   |
| <i>GSC</i>                           | AACGCGGAGAAGTGGAAACAAG    | CTGTCCGAGTCCAAATCGC      |
| <i>LEFTY2</i>                        | CTCCAACGCCAGGAACC         | GACATGGAGGAGCTGGTCA      |
| <i>LHX2</i>                          | CCAAGGACTTGAAGCAGCTC      | GTAAGAGGTTGCGCCTGAAC     |
| <i>NANOG</i>                         | GCCTGGTTGCCTCATGTTATTATGC | CCATGGAGGAAGGAAGAGGAGAGA |
| <i>OCT4</i>                          | TGGTCCGAGTGTGGTTCTGTAA    | TGTGCATAGTCGCTGCTTGAT    |
| <i>OTX2</i>                          | CATGCAGAGGTCCATCCCAT      | AAGCTGGGACTGATTGAGAT     |
| <i>PAX6</i>                          | TGGGCAGGTATTACGAGACTG     | ACTCCCCTTATACTGGGCTA     |
| <i>PAX6 3'UTR (Endo)</i>             | ATTGTGTTAATTCAGTCAGTG     | CCCAGTGGTACAATACAGGAC    |
| <i>SOX1</i>                          | AACACTTGAAGCCAGATGGA      | GCAGGCTGAATTCGGTTCTC     |
| <i>SOX10</i>                         | CTTTCTTGTGCTGCATACGG      | AGCTCAGCAAGACGCTGG       |
| <i>SOX17</i>                         | GGCGCAGCAGAATCCAGA        | CCACGACTTGCCCAGCAT       |
| <i>Epimark: PAX6 P0 Promoter</i>     | GGCAGGAATCATTTTTAGGAGGA   | CCTGGAGAGACCTTTGGCCTA    |
| <i>ChIP qPCR: PAX6 P0 Promoter 1</i> | CCTCCCACTGGCCACTCTAGT     | TAGGGGCTTACCAAGAACTA     |
| <i>ChIP qPCR: PAX6 P0 Promoter 2</i> | CCCCGCCTGCTTATCTGCCTG     | CTTCTCCCTCGGCACCCAG      |
| <i>ChIP qPCR: PAX6 P0 Promoter 3</i> | CGGGAAGAAGGGCACCCGCGG     | AGTCTGTGCTACCCCGGGCTG    |
| <i>ChIP qPCR: PAX6 P1 Promoter 1</i> | CCTAAGCTGGACTCGGGACTC     | CCGCCGTGTGCTCTGTGTCT     |
| <i>ChIP qPCR: PAX6 P1 Promoter 2</i> | GTCTGCTCAGTCCACGGAGGC     | GGAGTGTACTGAGGTGTGTCC    |
| <i>ChIP qPCR: PAX6 P1 Promoter 3</i> | CTCGCTCCACCGCTCCTCAC      | GAGAGCGAGCGGTGCATTTGC    |
| <i>ChIP qPCR: E -6k Enhancer</i>     | CATCCTTTCCTTCTTCTGCT      | CGTCCCCGCGTGCAAAGAGA     |
| <i>ChIP qPCR: E 156k Enhancer</i>    | ACTTAAATGCCTCAAACCTTTT    | TCTTGTAATGAGTAGCCTAT     |
| <i>ChIP qPCR: NANOG Promoter</i>     | GATGGGGGAATTCAGTCAGG      | GTCTCTCTTAATCAGCACAGT    |
| <i>ChIP qPCR: HERVK</i>              | AGAGGAAGGAATGCCTCTTGCACT  | TTACAAAGCAGTATTGCTGCCCGC |
| <i>ChIP qPCR: GATA3</i>              | GCTCCAGTCAAAGGCATCTC      | TAGGCACGCATGGATCATT      |
| <i>ChIP qPCR: HAND1</i>              | GGCAAGGCTGAAAATGAGAC      | GATAGCCACTCCCCCTTTTC     |
| <i>ChIP qPCR: GATA6</i>              | GGATGAGAACGGTTTCTGGA      | TTGTGAACCTGTGGCTCCTG     |
| <i>ChIP qPCR: SOX1</i>               | CAAGTGGTTTGTGCATCAGG      | GACGGAGAGGAATTCAGACG     |



Supplementary Table 4. 5mC MassArray bisulfite sequencing primers.

| Genomic Region            | Forward Primer                            | Reverse Primer                                              |
|---------------------------|-------------------------------------------|-------------------------------------------------------------|
| <i>PAX6 P0 Promoter 1</i> | AGGAAGAGAGAGTTTTTTTAAGGTTGGTGGTAGG        | CAGTAATACGACTCACTATAGGGAGAAGGCTCCTTCCTAACTAACCAATTTCTATCC   |
| <i>PAX6 P0 Promoter 2</i> | AGGAAGAGAGAGTATTTTGGTTGGGTTGTAGGGATT      | CAGTAATACGACTCACTATAGGGAGAAGGCTACCTCCCACTAACCCTCTAATCTA     |
| <i>PAX6 P0 Promoter 3</i> | AGGAAGAGAGATTTTAGGATATTTGAGGTTGGAGG       | CAGTAATACGACTCACTATAGGGAGAAGGCTACCAAAAAACAACCTCAAACAAC      |
| <i>PAX6 P0 Promoter 4</i> | AGGAAGAGAGTTTTAAATTGAAAAGTGATAGTGGTGG     | CAGTAATACGACTCACTATAGGGAGAAGGCTAAACAAAAAATAAATCAAATCCAA     |
| <i>PAX6 P0 Promoter 5</i> | AGGAAGAGAGGGTGTGAGGGAAAAATAGGTATAGAT      | CAGTAATACGACTCACTATAGGGAGAAGGCTCTCTAAATAATCACCTATCCCCTC     |
| <i>E -6k Enhancer 1</i>   | AGGAAGAGAGTGTGTTGTTGATTTTGAATATGAATAG     | CAGTAATACGACTCACTATAGGGAGAAGGCTCCTAAAAACCCCTAAAAAATAAATA    |
| <i>E -6k Enhancer 2</i>   | AGGAAGAGAGTGTGTTTTTTGTTTTAGGGGTTTTT       | CAGTAATACGACTCACTATAGGGAGAAGGCTAAAACCTTAACCTAACTTACACCCC    |
| <i>E -6k Enhancer 3</i>   | AGGAAGAGAGGTAGGATTTGTTGGGAAAAAGGTAT       | CAGTAATACGACTCACTATAGGGAGAAGGCTCTAAACAAAAAACCCCTTCTAACC     |
| <i>E -6k Enhancer 4</i>   | AGGAAGAGAGGAGGTTTTGGTTTAGGTTTTTTTTT       | CAGTAATACGACTCACTATAGGGAGAAGGCTACTACCTAACTTAAATATAACAATCACA |
| <i>E -6k Enhancer 5</i>   | AGGAAGAGAGGTTAGGTTTTTTTTGATGTTGGGATT      | CAGTAATACGACTCACTATAGGGAGAAGGCTTAAAAATAAATTTCTCCCTCCC       |
| <i>E -6k Enhancer 6</i>   | AGGAAGAGAGTGAATTTGTAATTATTTGTTTTTATGTTG   | CAGTAATACGACTCACTATAGGGAGAAGGCTTAATCTTCTCCCAACCTCCCTACTA    |
| <i>E -6k Enhancer 7</i>   | AGGAAGAGAGTTTTTTGTATAAAGGTTGTAGTTGTT      | CAGTAATACGACTCACTATAGGGAGAAGGCTACCAAAACCAAAACCTCCTCAATAC    |
| <i>E -6k Enhancer 8</i>   | AGGAAGAGAGGGAGTGGAGATTTTTTTGTTTTT         | CAGTAATACGACTCACTATAGGGAGAAGGCTAAACCTTAAACTCAACCTTACTTTT    |
| <i>E 156k Enhancer 1</i>  | AGGAAGAGAGTGGGTTAAATTTAGTTTTATGTTGTTG     | CAGTAATACGACTCACTATAGGGAGAAGGCTACTTTAAAAACTTTAAACTCCCTTCC   |
| <i>E 156k Enhancer 2</i>  | AGGAAGAGAGTGTGTTTTTAGGTTGGAGTATAGTGA      | CAGTAATACGACTCACTATAGGGAGAAGGCTCCACCTTAACCTCCCAAAATACTAA    |
| <i>E 156k Enhancer 3</i>  | AGGAAGAGAGATTATTTTGGTTGGTTAGGTTGGTT       | CAGTAATACGACTCACTATAGGGAGAAGGCTACCTTCCAAAAATAAATAACCCAAAA   |
| <i>E 156k Enhancer 4</i>  | AGGAAGAGAGGTTTTTAAATAGTTTTTGGAAATAAAGATAG | CAGTAATACGACTCACTATAGGGAGAAGGCTAACTCACACCTATAATCTCAACACTTT  |
| <i>E 156k Enhancer 5</i>  | AGGAAGAGAGGTTGGATGAGAAAATATGTGTATATAATG   | CAGTAATACGACTCACTATAGGGAGAAGGCTCATAAACCAAAATCCAACCTCATATT   |
| <i>E 156k Enhancer 6</i>  | AGGAAGAGAGTTGGTTTTTTATGTTGGTTGTAATAA      | CAGTAATACGACTCACTATAGGGAGAAGGCTAATAAAACCTTATCTACTAAAAATCAA  |
| <i>E 156k Enhancer 7</i>  | AGGAAGAGAGAAGAAATAGTTTTATTTTAGGTTAGGAAA   | CAGTAATACGACTCACTATAGGGAGAAGGCTAAACTCAAAACAATCCTCCTACCTC    |
| <i>E Ele4h Enhancer 1</i> | AGGAAGAGAGTTAATTTTAGAGAATAGGGAGAGGGA      | CAGTAATACGACTCACTATAGGGAGAAGGCTTACAAAATAACAAAACCTACACAAA    |
| <i>E Ele4h Enhancer 2</i> | AGGAAGAGAGTTTGTGGTAGTTTTGTTATTTTTGTGA     | CAGTAATACGACTCACTATAGGGAGAAGGCTCTTTCTAAAAACACCTTTCTTTTTTCC  |
| <i>E Ele4h Enhancer 3</i> | AGGAAGAGAGGTTTTTGGTGAGGGTTTTTTTTT         | CAGTAATACGACTCACTATAGGGAGAAGGCTTAACTCCCTATTCAACTCTCCTCTC    |
| <i>E Ele4h Enhancer 4</i> | AGGAAGAGAGTTTGGTATTAGTAGATTGGGAAATTG      | CAGTAATACGACTCACTATAGGGAGAAGGCTCTTCTCCAACAAAACAAAACCTAAC    |
| <i>E Ele4h Enhancer 5</i> | AGGAAGAGAGTTTGGTATTAGTAGATTGGGAATTGT      | CAGTAATACGACTCACTATAGGGAGAAGGCTCCCACCTCTAAACACAAAAACTT      |
| <i>E Ete1 Enhancer 1</i>  | AGGAAGAGAGGTTGTAGATTTGGGAATAGGTAGG        | CAGTAATACGACTCACTATAGGGAGAAGGCTTAAACCAATTTAAAAATCACCCCTC    |
| <i>E Ete1 Enhancer 2</i>  | AGGAAGAGAGTTTATGATTTGGAGGAGAAGGTTTAT      | CAGTAATACGACTCACTATAGGGAGAAGGCTTATCCCCTTAATAAATCAAAAAAAA    |
| <i>E Ete1 Enhancer 3</i>  | AGGAAGAGAGTGGAAGTTTATTTTAGGAGTGGAA        | CAGTAATACGACTCACTATAGGGAGAAGGCTACCTAACACCCCTTTTCTTATCATT    |
| <i>E Ete1 Enhancer 4</i>  | AGGAAGAGAGGGTAGGGGAAGTGGTAGATTTGAT        | CAGTAATACGACTCACTATAGGGAGAAGGCTACCCAAAAAATAACTAACCAACCT     |
| <i>E Ete1 Enhancer 5</i>  | AGGAAGAGAGATTTTTTGTGTTTTTTGTTTTT          | CAGTAATACGACTCACTATAGGGAGAAGGCTCCCTTTAAACTTCCCTCTAAAAAA     |
| <i>E Ete1 Enhancer 6</i>  | AGGAAGAGAGTTTTTAAGAGGGAAGTTTTAAAGGG       | CAGTAATACGACTCACTATAGGGAGAAGGCTAATCTCCATTCCAAAATAACCAAAC    |
| <i>E Ete1 Enhancer 7</i>  | AGGAAGAGAGGTTTTGTAGGATATTGATTTGTTGG       | CAGTAATACGACTCACTATAGGGAGAAGGCTAAAAACTAACCCCTAAAAACCTCCTC   |
| <i>E Ete1 Enhancer 8</i>  | AGGAAGAGAGGTTGTTAGTTTGGTGGTGTAT           | CAGTAATACGACTCACTATAGGGAGAAGGCTAATTAACCAAACTATTTCCCAACCC    |
| <i>E Ete1 Enhancer 9</i>  | AGGAAGAGAGTTTTTTTATAGAATTTGGATGATTGG      | CAGTAATACGACTCACTATAGGGAGAAGGCTTCTCACAAAAATAACTTCCAACCC     |

|                                     |                                          |                                                               |
|-------------------------------------|------------------------------------------|---------------------------------------------------------------|
| <b>E Ete1 Enhancer 10</b>           | AGGAAGAGAGTTTAGTTATTTGTGATAGGTGTTGGG     | CAGTAATACGACTCACTATAGGGAGAAGGCTAAAAATCTAATAATAAATCCAATCATCCA  |
| <b>E Ete1 Enhancer 11</b>           | AGGAAGAGAGTTTTTTAGTTTTTTTGGGAGTATTTTT    | CAGTAATACGACTCACTATAGGGAGAAGGCTAAAAAAATCCACTTCCCACTAC         |
| <b>E Ete1 Enhancer 12</b>           | AGGAAGAGAGTGTTTTTTTAGTGAGTTAGGGAAGG      | CAGTAATACGACTCACTATAGGGAGAAGGCTAAAAATCCCAACACCTATCACAAT       |
| <b>E Ete1 Enhancer 13</b>           | AGGAAGAGAGGGTTGTAAAGTGTAGATGGTTGGAT      | CAGTAATACGACTCACTATAGGGAGAAGGCTCCCTTCCCTAACTCAAAAAAAC         |
| <b>E Ete1 Enhancer 14</b>           | AGGAAGAGAGGTTTTGAGTTGGGAGTAGGGG          | CAGTAATACGACTCACTATAGGGAGAAGGCTATCCAACCATCTACACTTTACAACC      |
| <b>E Ete1 Enhancer 15</b>           | AGGAAGAGAGGGATTATGTAAGGTTTAGGTTTAGA      | CAGTAATACGACTCACTATAGGGAGAAGGCTACCAAAAAACAACCTCAAACAAC        |
| <b>E P1 Promoter E1 Enhancer 1</b>  | AGGAAGAGAGGGGTGTAAGTTTTTGTGTTGTTTTT      | CAGTAATACGACTCACTATAGGGAGAAGGCTACCTCTCAACCAAACTATACCTC        |
| <b>E P1 Promoter E1 Enhancer 2</b>  | AGGAAGAGAGGAGGTATAGTTTTTGGTTGGAGAGGT     | CAGTAATACGACTCACTATAGGGAGAAGGCTAATAAAACACACACACACACACA        |
| <b>E P1 Promoter E1 Enhancer 3</b>  | AGGAAGAGAGGGTAGGGAGGTTGAAATGAAGTAGT      | CAGTAATACGACTCACTATAGGGAGAAGGCTACCCACCTCTAACTAAAACC           |
| <b>E P1 Promoter E1 Enhancer 4</b>  | AGGAAGAGAGTTGGAGGATGATGATAGAGGTTAGGT     | CAGTAATACGACTCACTATAGGGAGAAGGCTAAAACATCCTTTCTAATTATCACAACCTTC |
| <b>E P1 Promoter E1 Enhancer 5</b>  | AGGAAGAGAGTTGTTTTGTATAAAGTAATTTTTGTGTGA  | CAGTAATACGACTCACTATAGGGAGAAGGCTAAAAATAACTACAACCAACACACCT      |
| <b>E P1 Promoter E1 Enhancer 6</b>  | AGGAAGAGAGGGTGAGGATTTTTTAGGGTTTTTTT      | CAGTAATACGACTCACTATAGGGAGAAGGCTTATCCTTTCTTACCAACTCCAAAAC      |
| <b>E P1 Promoter E1 Enhancer 7</b>  | AGGAAGAGAGGGTGAGGATTTTTTAGGGTTTTTTTA     | CAGTAATACGACTCACTATAGGGAGAAGGCTATCCTAACAACTCCATTCACACTAC      |
| <b>E P1 Promoter E1 Enhancer 8</b>  | AGGAAGAGAGGGATTGAGTAGATTTAGGAGAGGGA      | CAGTAATACGACTCACTATAGGGAGAAGGCTAAAAACACAACCTCTAACTAAAAAAACC   |
| <b>E P1 Promoter E1 Enhancer 9</b>  | AGGAAGAGAGTTTTGGTAATAGTTGAAGGGGAGTT      | CAGTAATACGACTCACTATAGGGAGAAGGCTTAAAAAACCTTAAAAAATCCTCACC      |
| <b>E P1 Promoter E1 Enhancer 10</b> | AGGAAGAGAGTTTTTGTTTTTGGGGTGTGTATAGTA     | CAGTAATACGACTCACTATAGGGAGAAGGCTAAACAACCTCCCTTCAACTATTACC      |
| <b>E P1 Promoter E1 Enhancer 11</b> | AGGAAGAGAGGGTTGTTGGGTTTTTAGGTAGGAA       | CAGTAATACGACTCACTATAGGGAGAAGGCTAAACACACCTCAATCACTCCAAAA       |
| <b>GAPDH Promoter 1</b>             | AGGAAGAGAGTTTAGAAAGGTAGGGTTAGGGATTG      | CAGTAATACGACTCACTATAGGGAGAAGGCTCAATATACCTTTCATTCCATCCAAC      |
| <b>GAPDH Promoter 2</b>             | AGGAAGAGAGGTTGGATGGAATGAAAGGTATATTG      | CAGTAATACGACTCACTATAGGGAGAAGGCTAAACAAAAACCTAAAAAAACCCAT       |
| <b>GAPDH Promoter 3</b>             | AGGAAGAGAGGAGATGTTAGGAGTTAGGAGATGGG      | CAGTAATACGACTCACTATAGGGAGAAGGCTTCCCAAACTAAACTATAAACAACAAAA    |
| <b>OCT4 Promoter 1</b>              | AGGAAGAGAGGATTAGATTTTGGATTGATTGGG        | CAGTAATACGACTCACTATAGGGAGAAGGCTAATTAAAAAACAACCAATCCCTC        |
| <b>OCT4 Promoter 2</b>              | AGGAAGAGAGTGTTTTTTAGGAATTTAGGTGTTTGA     | CAGTAATACGACTCACTATAGGGAGAAGGCTAAAAAAATAAAAAACCAACCCCTT       |
| <b>OCT4 Promoter 3</b>              | AGGAAGAGAGGTTTAAATGGTGGTGGTAATGGTGT      | CAGTAATACGACTCACTATAGGGAGAAGGCTACAAAACCTAAAAAATACCAAAAA       |
| <b>NANOG Promoter 1</b>             | AGGAAGAGAGTGTGGGAGTAAAGTTAGTTGTTTTG      | CAGTAATACGACTCACTATAGGGAGAAGGCTTATCTATCCCTCCTCCCAATAATC       |
| <b>NANOG Promoter 2</b>             | AGGAAGAGAGTTTTTGTATTTTGTGTTTTTGGGTTT     | CAGTAATACGACTCACTATAGGGAGAAGGCTCTTAATAACCTTAAACACCCCACT       |
| <b>NANOG Promoter 3</b>             | AGGAAGAGAGAATTTTTTGAATTTGGGAGGTAGAG      | CAGTAATACGACTCACTATAGGGAGAAGGCTAAAAACATAACAAATCACCAACC        |
| <b>NANOG Promoter 4</b>             | AGGAAGAGAGGGGTATATTTTTTATTGATTTATTTTTGTG | CAGTAATACGACTCACTATAGGGAGAAGGCTTAACTAAAACACCAACCCACCA         |

|                          |                                        |                                                              |
|--------------------------|----------------------------------------|--------------------------------------------------------------|
| <b>SOX2 Promoter 1</b>   | AGGAAGAGAGAAAGATTTTAATAAGAGACTGGAAGGAA | CAGTAATACGACTCACTATAGGGAGAAGGCTAACAAAACCAACCTAACATTTTC       |
| <b>SOX2 Promoter 2</b>   | AGGAAGAGAGGTGGGATGTTAGGAAGTTGAAATTAT   | CAGTAATACGACTCACTATAGGGAGAAGGCTTAAAAACCCAAACCTCTATCCTC       |
| <b>SOX2 Promoter 3</b>   | AGGAAGAGAGGGATAGAGGTTTGGGTTTTTAATTT    | CAGTAATACGACTCACTATAGGGAGAAGGCTAAACCAACCTACCAACCACTAAAA      |
| <b>FOXA2 Promoter 1</b>  | AGGAAGAGAGTGGTTTTGGATATTTTATAAAGAGGGT  | CAGTAATACGACTCACTATAGGGAGAAGGCTAAAAATAACACCCACATAAACTCACA    |
| <b>FOXA2 Promoter 2</b>  | AGGAAGAGAGTTTTTATTTTGTTTTTTGGGTGGAA    | CAGTAATACGACTCACTATAGGGAGAAGGCTCCTAAAAATTAAACTCCAAAAAAACC    |
| <b>FOXA2 Promoter 3</b>  | AGGAAGAGAGTGTAGATTTGAGAGTTTTTGGGGTTA   | CAGTAATACGACTCACTATAGGGAGAAGGCTTCTCTATCCTCTCTATCTTCCAAAAAA   |
| <b>FOXA2 Promoter 4</b>  | AGGAAGAGAGTTTAATAAAATGGAAAGGAAGGGT     | CAGTAATACGACTCACTATAGGGAGAAGGCTTAAAAACCCCAACCCCTAAATTCTAC    |
| <b>SOX10 Promoter 1</b>  | AGGAAGAGAGTTTGTGAGGTTTATTTTGGGTTTTA    | CAGTAATACGACTCACTATAGGGAGAAGGCTCCACCTAACCTCCTAACAACTTTTA     |
| <b>SOX10 Promoter 2</b>  | AGGAAGAGAGTTTGGGTAGTAGGGTAGGGAG        | CAGTAATACGACTCACTATAGGGAGAAGGCTAAAAACCTAAACCTCAAACCAC        |
| <b>SOX17 Promoter 1</b>  | AGGAAGAGAGATATAGGTAAGTTGAGTTTGGGGG     | CAGTAATACGACTCACTATAGGGAGAAGGCTAAACCTTTTCTACACAAATATAACCAA   |
| <b>SOX17 Promoter 2</b>  | AGGAAGAGAGAAAGGATATTTAATTAGGGAAGGGG    | CAGTAATACGACTCACTATAGGGAGAAGGCTCAACAAAATCCAAACCTACACAAC      |
| <b>SOX17 Promoter 3</b>  | AGGAAGAGAGTATTTGTAGTTGGGGTGGTTTTGTA    | CAGTAATACGACTCACTATAGGGAGAAGGCTACCCCTTCCCTAATTAAATATCCTT     |
| <b>SOX17 Promoter 4</b>  | AGGAAGAGAGTAATAAATTTTAGGAAATGGAGGAAGT  | CAGTAATACGACTCACTATAGGGAGAAGGCTAAACCTAAAAATAAACCCTCCCTACC    |
| <b>GATA2 Promoter 1</b>  | AGGAAGAGAGGAGTTTTAAAGGTAGGGTTATAGGG    | CAGTAATACGACTCACTATAGGGAGAAGGCTCCACATCCATCCTAACAAAACC        |
| <b>GATA2 Promoter 2</b>  | AGGAAGAGAGGGTTTTTGTAGGATGGATGTGG       | CAGTAATACGACTCACTATAGGGAGAAGGCTCAAACCTTCTAAACAACATCCC        |
| <b>GATA2 Promoter 3</b>  | AGGAAGAGAGTTGATTTGTGGAATGGGAATTAG      | CAGTAATACGACTCACTATAGGGAGAAGGCTCACATCCCTACACATATACACACAA     |
| <b>LEFTY2 Enhancer 1</b> | AGGAAGAGAGGAGAAGTAGAGTAGGAAGTTAGGTTGG  | CAGTAATACGACTCACTATAGGGAGAAGGCTATTACTCTAAAACCCCTCTCCCTTT     |
| <b>LEFTY2 Enhancer 2</b> | AGGAAGAGAGTTTTTATATTTAGAAGTGGGGAGGG    | CAGTAATACGACTCACTATAGGGAGAAGGCTCCAAAAACATTTCTATCTCTTAACACC   |
| <b>LEFTY2 Enhancer 3</b> | AGGAAGAGAGAGTTTTTTGTGGGTATAGGGTAG      | CAGTAATACGACTCACTATAGGGAGAAGGCTTCTTACCTACTTAAAAAACTCAAATAAAA |

**Supplementary Table 5. Genomic coordinates for promoters and enhancers investigated for methylation analysis by 5mC MassArray and for targeted demethylation by dCas9-TET1CD.**

| Region                     | Genomic Coordinates (GRCh37/hg19) |
|----------------------------|-----------------------------------|
| <i>PAX6</i> P0 Promoter    | Chr11: 31839283–31840731          |
| <i>PAX6</i> P1 Promoter    | Chr11: 31832705–31834156          |
| <i>PAX6</i> 156k Enhancer  | Chr11: 31679370–31690371          |
| <i>PAX6</i> Ele4h Enhancer | Chr11: 31825691–31825906          |
| <i>PAX6</i> E1E Enhancer   | Chr11: 31832708–31832765          |
| <i>PAX6</i> Ete1 Enhancer  | Chr11: 31837446–31839211          |
| <i>PAX6</i> -6k Enhancer   | Chr11: 31847524–31848122          |
| <i>SOX10</i> Promoter      | Chr22: 38380465–38381233          |
| <i>LEFTY2</i> Enhancer     | Chr1: 226138153–226139319         |
| <i>GAPDH</i> Promoter      | Chr12: 6642271–6643589            |
| <i>OCT4</i> Promoter       | Chr6: 31138570–31139891           |
| <i>NANOG</i> Promoter      | Chr12: 7940446–7941959            |
| <i>SOX2</i> Promoter       | Chr3: 181428186–181429721         |
| <i>FOXA2</i> Promoter      | Chr20: 22566291–22567649          |
| <i>SOX17</i> Promoter      | Chr8: 55369986–55370476           |
| <i>GATA2</i> Promoter      | Chr3: 128211937–128212937         |

**Supplementary Table 6. Primers for cloning *PAX6* overexpression vector, dCas9-TET1 catalytic domain fusion (dCas9-TET1CD) and mutagenesis of dCas9-TET1CD (dCas9-TET1CD/Mut).**

| Cloning Construct                        | Forward Primer                         | Reverse Primer                          |
|------------------------------------------|----------------------------------------|-----------------------------------------|
| 2A-GFP construct                         | GGATCCGCCACTAACTTCTCCCTGT              | GGCGCGCCTTACTTGTACAGCTCGTCCAT           |
| <i>PAX6</i> cDNA construct               | CACCGAATTCATGCAGAACAGTCACAGCGGA        | GGATCCCTGTAATCTTGGCCAGTATTG             |
| TET1 catalytic domain (for dCas9-TET1CD) | ACTGAGGCCGGCCAGCTGCCACCTGCAGCTGTCTT    | TTCTTGGCCGGCCTCAGACCCAATGGTTATAGG       |
| TET1 catalytic domain mutagenesis        | GGACTTCTGTGCTCATCCCTACAGGGCCATTACAACAT | ATGTTGTGAATGGCCCTGTAGGGATGAGCACAGAAGTCC |
